# Supplementary figures and images for: Enhancing apoptosis in TRAIL-resistant cancer cells using fundamental response rules
Source: PubMed Central journal article supplement — Sci Rep. 2011 Nov 7;1:144. doi: 10.1038/srep00144 (PMC3216625; doi:10.1038/srep00144), 2011-11-07

# Figure S1

**A**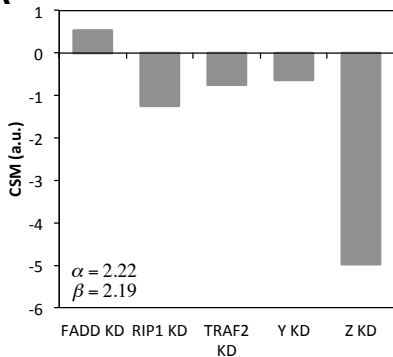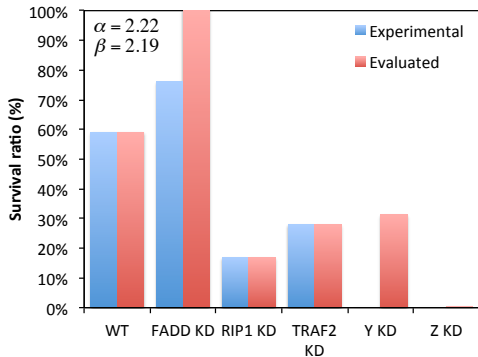**B**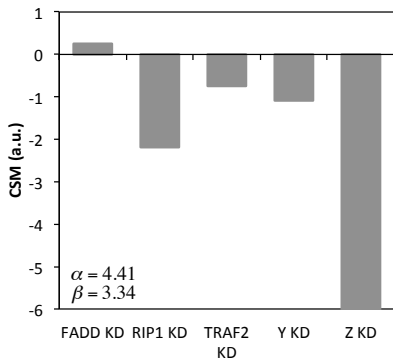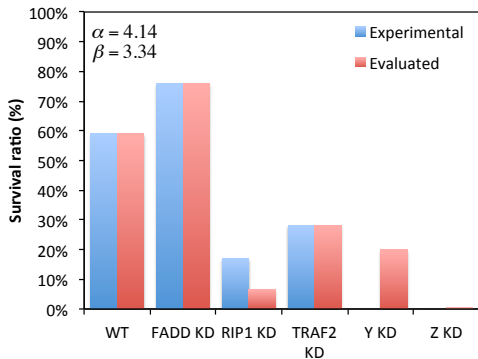

Supplement: srep00144-s1.pdf [file srep00144-s1.pdf]
